# Supplementary material for: CRISPR-Cas9 Gene Editing and Secondary Metabolite Screening Confirm Fusarium graminearum C16 Biosynthetic Gene Cluster Products as Decalin-Containing Diterpenoid Pyrones
Source: MDPI journal article supplement (doi:10.3390/jof9070695), 2023-06-23
Supplement: s1 [file s1]

## **CRISPR-Cas9 gene editing and secondary metabolite screening confirm *Fusarium graminearum* C16 biosynthetic gene cluster products as decalin-containing diterpenoid pyrones.**

**Carmen Hicks<sup>1,2</sup>, Thomas E. Witte<sup>1</sup>, Amanda Sproule<sup>1</sup>, Anne Hermans<sup>1</sup>, Samuel W. Shields<sup>1</sup>, Ronan Colquhoun<sup>1</sup>, Chris Blackman<sup>1</sup>, Christopher N. Boddy<sup>2</sup>, Rajagopal Subramaniam<sup>1</sup>, David P. Overy<sup>1</sup>**

### **SUPPLEMENTARY INFORMATION**

#### *Detailed Metabolomics Workflow: Data Pre-Processing*

UPLC-HRMS profiles of both broth and mycelium extracts were processed together, while UPLC-HRMS profiles of the in planta extracts were processed separately; all data were compiled into a representative matrix of metabolite mass features denoted with a retention time (RT) and mass to charge ratio ( $m/z$ ). Raw data files included MeOH blanks run after every sixth sample, and all were carefully examined to determine a minimum noise level threshold for data analysis. Processing of the UPLC-HRMS raw data files was completed using MzMine 2.53 (Pluskal et al., 2010). Mass features were detected with an exact mass noise threshold of 1E4 and chromatographic building was completed with the ADAP algorithm using a minimum group size of 5, a group intensity threshold of 5E6 and a minimum highest intensity of 1E7 for the in vitro experiment, and a group intensity threshold of 1E5 and a minimum highest intensity of 2E5 for the in planta experiment. RT and  $m/z$  tolerances were consistently set to 0.01 min and 0.001  $m/z$  or 5 ppm throughout all phases of processing. Smoothing was then applied at a filter width of 5. Deconvolution of the chromatograms was completed using the wavelets ADAP algorithm with a S/N of 1, minimum feature height of 1E4, coefficient area of 110, a peak duration range of 0.0-10.00 min and an RT wavelet range of 0.0-0.1 min. Following deconvolution, isotopic peaks were grouped together, and the JOIN aligner was used using a 20:10  $m/z$  to RT weight. Same RT and  $m/z$  gap filling was then applied to back call in any points that were excluded from the original processing parameters but present in the data set.

#### *Metabolomics: Binary Transformation and Data Reduction*

Data matrices of mass feature peak height intensities from the in vitro WT media experiments were imported into R Studio for data processing (R Core Team, 2022). Maximum peak height intensities from MeOH blanks for each mass feature were back subtracted from all sample masses in order to reduce false positives resulting from sample carry-over and/or gap filling errors. All mass feature values transformed into a binary presence absence matrix in which values >1E4 were converted to 1, and values <1E4 converted to 0 (following protocols by Witte & Overy, 2021). Mass feature occurrences of individual sample replicates were then consolidated by applying a 75% inclusion (3/4 replicates) on mass features (i.e. a feature had to be >1E4 in a minimum of 3 samples to be considered detected within a sample) to generate a matrix containing 304 mass features. The final media consensus matrix was generating, compressing all sample types per medium, using the sums from binary consensus for each of the media types to obtain an overview of all potential features detected per media type across the various conditions. Consensus heatmaps were generated using the final media consensus as a guide for the clustering algorithm. The “pheatmap” R package, was used to generate the initial heatmap with the ‘ward.D2’ applied as both row and column clustering algorithm (Kolde R, 2019). This clustering pattern

was then applied to each of the four extract/culture type binary consensus' in order to sort all features and samples to correspond with the media consensus format.

#### *Metabolomics: Statistical Analysis*

For data comparison of the WT and gene knock out mutants extract profiles from the Q6 media study and the *in planta* infection trials, the resulting data matrix was exported from MZmine as a csv file as a matrix of peak height intensities and imported into R Studio for further processing. First, the maximum detected blank value for each mass feature was back subtracted from all sample masses in order to reduce false positives that may result from either sample carry-over or gap filling errors. The data was then normalized to the total ion current by sample sums. Univariate analysis was completed using the 'MUMA' R package which utilizes both Welch's T tests and Wilcoxon-Mann Whitney U tests for normally and non-normally distribution mass features respectively based on Shapiro scores when determining P-values (Gaude et al., 2013). This is advantageous as mass features constructed or containing portions constructed by knocked out genes are expected to be absent from KO strains, thereby deviating from normal distribution. Mass feature P-value comparing the  $\Delta$ PKS15 and WT strain were then used to generate plots against their respective retention time. To further examine the features of statistical significance, features with P-values <0.05 were plotted by RT and *m/z*. XICs of mass features were clipped from Xcalibur with a  $\pm 5$  ppm tolerance on the predicted exact mass.

#### *Media and Reagent Formulations Used: Generation of CRISPR Transformants*

##### *CMC Medium*

|                                      |         |
|--------------------------------------|---------|
| Carboxymethylcellulose               | 15g     |
| NH <sub>4</sub> NO <sub>3</sub>      | 1g      |
| KH <sub>2</sub> PO <sub>4</sub>      | 1g      |
| MgSO <sub>4</sub> ·7H <sub>2</sub> O | 0.5g    |
| Yeast Extract                        | 1g      |
| MilliQ Water                         | to 1.0L |

##### *Littman Oxgall Medium*

|               |         |
|---------------|---------|
| Oxgall powder | 15.0g   |
| Dextrose      | 10.0g   |
| Peptone       | 10.0g   |
| MilliQ Water  | to 1.0L |

*Note: Littman Oxgall medium has been observed to promote hyphal branching in actively growing mycelia, likely aiding in the formation of protoplasts*

##### *Liquid TB3 Medium*

|                |         |
|----------------|---------|
| Yeast Extract  | 3.0g    |
| Casamino Acids | 3.0g    |
| Sucrose        | 200.0g  |
| MilliQ Water   | to 1.0L |

##### *Molten TB3 Medium*

|                |      |
|----------------|------|
| Yeast Extract  | 3.0g |
| Casamino Acids | 3.0g |

|              |         |
|--------------|---------|
| Sucrose      | 200.0g  |
| LMP Agarose  | 7.0g    |
| MilliQ Water | to 1.0L |

*PDA Medium*

|                            |         |
|----------------------------|---------|
| Difco Potato Dextrose Agar | 39.0g   |
| MilliQ Water               | to 1.0L |

*S1M Medium*

|                                      |         |
|--------------------------------------|---------|
| NH <sub>4</sub> Cl                   | 3g      |
| MgSO <sub>4</sub> ·7H <sub>2</sub> O | 2g      |
| FeSO <sub>4</sub> ·7H <sub>2</sub> O | 0.2g    |
| KH <sub>2</sub> PO <sub>4</sub>      | 2g      |
| Peptone                              | 2g      |
| Yeast Extract                        | 2g      |
| Malt Extract                         | 2g      |
| Glucose                              | 20g     |
| MilliQ Water                         | to 1.0L |

*STC Buffer*

|                   |      |
|-------------------|------|
| Sorbitol          | 1.2M |
| Tris-HCl, pH 8.0  | 10mM |
| CaCl <sub>2</sub> | 50mM |

*Cas-9 Working Buffer*

|       |       |
|-------|-------|
| HEPES | 20mM  |
| KCl   | 150mM |

Adjust to pH 7.5

*PEF(4000)-CaCl<sub>2</sub> Buffer*

|                   |           |
|-------------------|-----------|
| PEG(4000)         | 60% (w/v) |
| CaCl <sub>2</sub> | 50Mm      |
| Tris-HCl, pH 7.5  | 450Mm     |

*Media and Reagent Formulations Used: In WT Secondary Metabolite Profiling*

\* agar was only included for solid cultures

*CS Medium (1L)*

|                                      |         |
|--------------------------------------|---------|
| Cottonseed Flour                     | 20g     |
| Soy Peptone                          | 2g      |
| Maltose                              | 40g     |
| MgSO <sub>4</sub> ·7H <sub>2</sub> O | 2g      |
| NaCl                                 | 2g      |
| CaCO <sub>3</sub>                    | 3mg     |
| MilliQ Water                         | to 1.0L |
| Agar*                                | 20g     |

*CYA Medium (1L)*

|                                      |         |
|--------------------------------------|---------|
| NaNO <sub>3</sub>                    | 3g      |
| KH <sub>2</sub> PO <sub>4</sub>      | 1g      |
| KCl                                  | 0.5g    |
| MgSO <sub>4</sub> ·7H <sub>2</sub> O | 0.5g    |
| FeSO <sub>4</sub> ·7H <sub>2</sub> O | 10mg    |
| Yeast Extract                        | 5g      |
| Sucrose                              | 30g     |
| MilliQ Water                         | to 1.0L |
| Trace Element Solution               | 1000μL  |
| ZnSO <sub>4</sub> ·7H <sub>2</sub> O | 1g      |
| CuSO <sub>4</sub> ·5H <sub>2</sub> O | 0.5g    |
| MilliQ Water                         | 100mL   |
| Agar*                                | 20g     |
| <i>CYS80 Medium (1L)</i>             |         |
| Sucrose                              | 80g     |
| Corn Meal                            | 50g     |
| Yeast Extract                        | 1g      |
| MgSO <sub>4</sub> ·7H <sub>2</sub> O | 0.5g    |
| MilliQ Water                         | to 1.0L |
| Agar*                                | 20g     |
| <i>PDA Medium (1L)</i>               |         |
| Difco Potato Dextrose Broth          | 36.0g   |
| MilliQ Water                         | to 1.0L |
| Agar*                                | 20g     |
| <i>MEA Medium (1L)</i>               |         |
| Malt Extract                         | 20g     |
| Peptone                              | 1g      |
| D-glucose                            | 20g     |
| MilliQ Water                         | to 1.0L |
| Trace Element Solution               | 1000uL  |
| Agar*                                | 20g     |
| <i>MMK2 Medium (1L)</i>              |         |
| Mannitol                             | 40g     |
| Yeast Extract                        | 5g      |
| Murashige & Skoog Salts              | 4.3g    |
| MilliQ Water                         | to 1.0L |
| Agar*                                | 20g     |
| <i>Q6 Medium (1L)</i>                |         |
| D-Glucose                            | 2.5g    |
| Glycerol                             | 1.g     |
| Cottonseed Flour                     | 5g      |
| MilliQ Water                         | to 1.0L |
| Agar*                                | 20g     |

*S2M Medium (1L)*

|                                                                  |      |
|------------------------------------------------------------------|------|
| (NH <sub>4</sub> ) <sub>2</sub> HPO <sub>4</sub> -OR- Putrescine | 1g   |
| KH <sub>2</sub> PO <sub>4</sub>                                  | 3g   |
| MgSO <sub>4</sub> ·7H <sub>2</sub> O                             | 0.2g |
| NaCl                                                             | 5g   |
| Sucrose                                                          | 40g  |
| Glycerol                                                         | 10g  |

*NPN-A Medium (1L)*

|                                                         |     |
|---------------------------------------------------------|-----|
| S1M                                                     | 10% |
| S2M ((NH <sub>4</sub> ) <sub>2</sub> HPO <sub>4</sub> ) | 90% |
| Agar*                                                   | 20g |

*NPN-p Medium (1L)*

|                  |     |
|------------------|-----|
| S1M              | 10% |
| S2M (Putrescine) | 90% |
| Agar*            | 20g |

*YES Medium (1L)*

|                                    |         |
|------------------------------------|---------|
| Yeast Extract                      | 20g     |
| Sucrose                            | 150g    |
| MgSO <sub>4</sub> H <sub>2</sub> O | 0.5g    |
| MilliQ Water                       | to 1.0L |
| Agar*                              | 20g     |

*YES+IO Medium (1L)*

|               |      |
|---------------|------|
| YES Medium    | 1.0L |
| Instant Ocean | 18g  |
| Agar*         | 20g  |

*ZM/2 Medium (1L)*

|                                                 |         |
|-------------------------------------------------|---------|
| Molasses                                        | 5g      |
| Oatmeal (Flakes ground)                         | 5g      |
| Sucrose                                         | 4g      |
| D-Glucose                                       | 1.5g    |
| CaCO <sub>3</sub>                               | 1.5mg   |
| Edamin                                          | 0.5g    |
| (NH <sub>4</sub> ) <sub>2</sub> SO <sub>4</sub> | 0.5g    |
| MilliQ Water                                    | to 1.0L |
| Agar*                                           | 20g     |

**Table S1:** List of genes within the C16 BGC with genes used to generate CRISPR-Cas9 KO strains identified in bold.

| Gene Cluster | LocusID           | Protein Signature                               |
|--------------|-------------------|-------------------------------------------------|
| C16          | FGSG_04596        | O-methyltransferase                             |
|              | FGSG_04595        | Flavin-containing monooxygenase                 |
|              | FGSG_12222        | Terpene cyclase                                 |
|              | FGSG_12223        | Short-chain dehydrogenase/reductase 1           |
|              | FGSG_04593        | Prenyltransferase                               |
|              | FGSG_04592        | Short-chain dehydrogenase/reductase 2           |
|              | <b>FGSG_04591</b> | <b>Geranylgeranyl diphosphate synthase (TS)</b> |
|              | FGSG_04590        | Cytochrome p450                                 |
|              | FGSG_04589        | O-methyltransferase                             |
|              | <b>FGSG_04588</b> | <b>Nonreducing polyketide synthase (PKS15)</b>  |

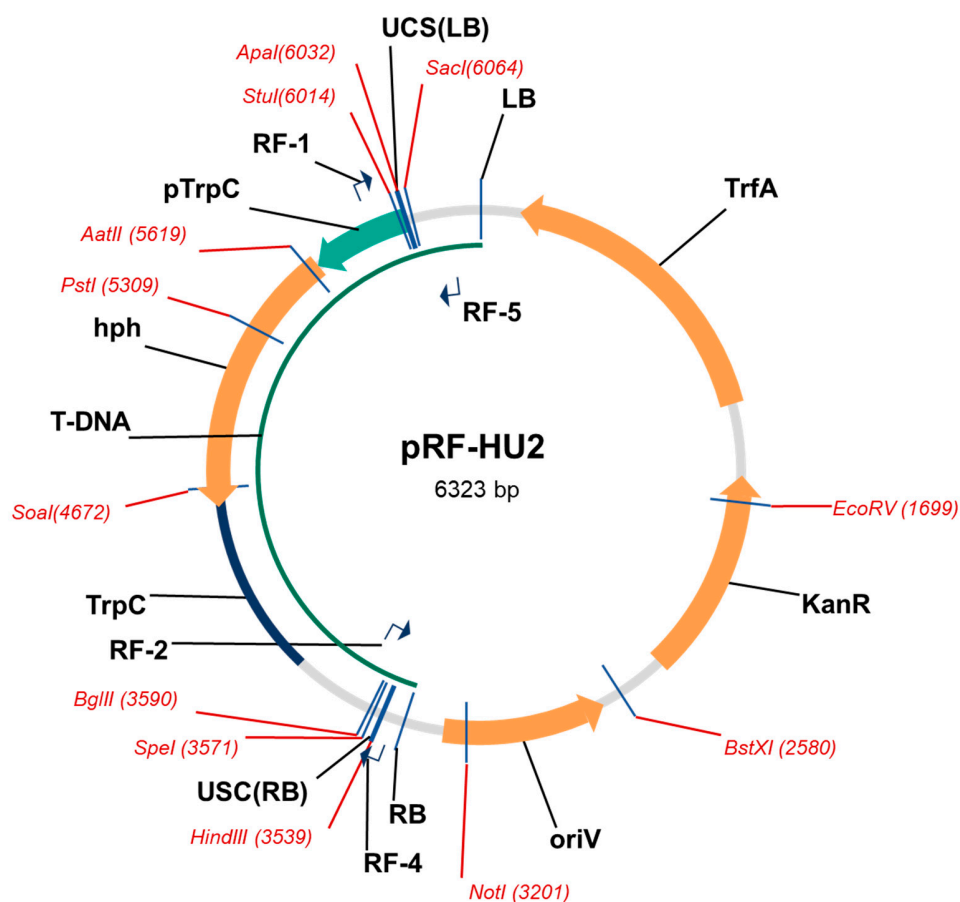

**Figure S1:** pRF-HU2 vector map used in construction of Hygromycin repair templates

Sequence used for the hygromycin repair template amplified from pRF-HU2 vector. pTrpC promoter sequence is indicated in blue and hygromycin B is indicated in red. Upstream and downstream primers were amplified with regions indicated in green and yellow respectively and HYG588U and HYG588L positive control amplification primers are indicated highlighted in grey.

ctattccttgcctcggacgagtgcgggctggtttcactatcggcgagtacttctacacagccatcggccagacggccgcttctcgggcgatttgttac  
gcccacagtcccgctcggatcggacgattgcgtcgcatcgacctcgcccaagctgcatcatcgaaattgccgtcaaccaagctctgatagatttgtcaagac  
caatcgggagcatatacgcccggagccgcgcgatcctgcaagctcggatgctcgcgtaagtagcgcgtctgctgctccatacaagccaaccacggcctccag  
aagaagatgttgcgacctcgtatttgggaatccccgaacatcgctcgtccagtcgaatgaccgctgttatgcggccattgtcgtcaggacattgttgagccgaaat  
ccgctgcacgaggtgccgacttcgggagcgtcctcgcccaagcatcagctcatcgagagcctgcgcgacggacgcactgacggtgtcgtccatcacagtttgc  
agtatacatatgggatcagcaatcgcgcatatgaatcacgccatgtagtgattgaccgattccttgcggtccgaatgggccaacccgctcgtctggctaagatc  
ggccgagcgatcgcatcatggcctccgacggcgtgcagaacagcgggagctcgtttcaggcaggtcttgcaacgtgacaccctgtgcacggcgggagatgc  
aataggtcaggctctcgtgaattcccaatgcaagcacttcggaatcgggagcgcggccgatgcaagtgcgataaacataacgatctttagaaccatcgg  
cgcgactatttaccgcaggacatatccacgctcctacatcgaagctgaaagcacgagattcttgcctccgagagctgcatcaggctcgagacgctgtcgaact  
tttcatcagaaacttctgcagacgctcgcggtgagttcaggcttttcatatcgatgcttgggtagaataggtcagattgaatcgtgaaataaaggaggaagg  
gcgaacttaagaaggtatgaccgggtcgttacttacttgcgttgcacaaacgaccaagttatcgtgcaccaagcagcagatgataataatgtcctcgttctgtcgt  
aataagagtcacacttcgagcggcgctactgtcacaagtggtgctgatcgaccagttgcctaatgaaccttctgcaaacgacacaaatttgcctcaccgc  
ctggacgactaaacaaataggcattcattgtgacctcactagctccagccaagcccaaaagtgccttcaatatcatcttctgcga

**Table S2:** Primers used in the amplification of repair templates

| Gene Cluster | Primer ID | Location | Primer Name          | Nt | Primer Sequence 5'-3'                                                       |
|--------------|-----------|----------|----------------------|----|-----------------------------------------------------------------------------|
| FGSG_04588   | 5         | DO       | FGSG_04588hygMicroDO | 70 | CACCACAATTAATCCCGTCAGGTTACAGCTCTCTGTGGTCTAGCTAAACGCTATTGCTTTGCCCTCGGAC      |
|              |           | UP       | FGSG_04588hygMicroUP | 75 | CCAAATACGAATAATATAGTAAAGAATGTGATTAGTCTGCATTGCTTCCGTCGATCGACAGAAGATGATA TTGA |
| FGSG_04591   | 6         | DO       | FGSG_04591hygMicroDO | 70 | CGTCCGATGATGGGTCCGTAGAACAGCAGCTACTCAGGGTGTCTCTTTATCTATTGCTTTGCCCTCGGAC      |
|              |           | UP       | FGSG_04591hygMicroUP | 71 | GAGACCGTTTAGTTGACATATCTTGATATTCTAATAGTGGTGTCTTATCGTCGACAGAAGATGATTGA        |

**Table S3:** List of crRNA primers

| Gene       | crRNA Name      | Length | Sequence                             |
|------------|-----------------|--------|--------------------------------------|
| FGSG_04588 | 04588gRNA-down1 | 36     | GAACGGGAUACCAGUUCUGGGUUUUAGAGCUAUGCU |
|            | 04588gRNA-up1   | 36     | AUUAGUCUGCAUUGCUUCCGGUUUUAGAGCUAUGCU |
| FGSG_04591 | 04591gRNA-down1 | 36     | GGAUGGAACCGUGUGACUCUGUUUUAGAGCUAUGCU |
|            | 04591gRNA-up1   | 36     | GUAUAGUGGUGUCUUAUCGGUUUUAGAGCUAUGCU  |

**Table S4:** List of GOI internal primers used for confirmation of gene knockout

| Gene       | CH Primer ID | Primer Type | Direction | Primer Name     | Nt Count | Tm (°C) | Primer Sequence 5' - 3' | Amplicon Size (bp) |
|------------|--------------|-------------|-----------|-----------------|----------|---------|-------------------------|--------------------|
| FGSG_04588 | 5            | Int         | F1        | FGSG_04588IntF1 | 20       | 56.9    | CCATCAGTACGTCCGCTCAA    | 442                |
|            |              | Int         | R1        | FGSG_04588IntR1 | 20       | 57.1    | CTCTGGGCCATATCCGTCAC    |                    |
| FGSG_04591 | 6            | Int         | F1        | FGSG_04591IntF1 | 20       | 57.3    | TGGGCATGATTGGACTGGAG    | 350                |
|            |              | Int         | R1        | FGSG_04591IntR1 | 20       | 57.7    | GTATGACCTGAGCTGCTGGG    |                    |

**Table S5:** Refer to SI\_Table\_5.xlsx

**Table S6:** Refer to SI\_Table\_6.xlsx



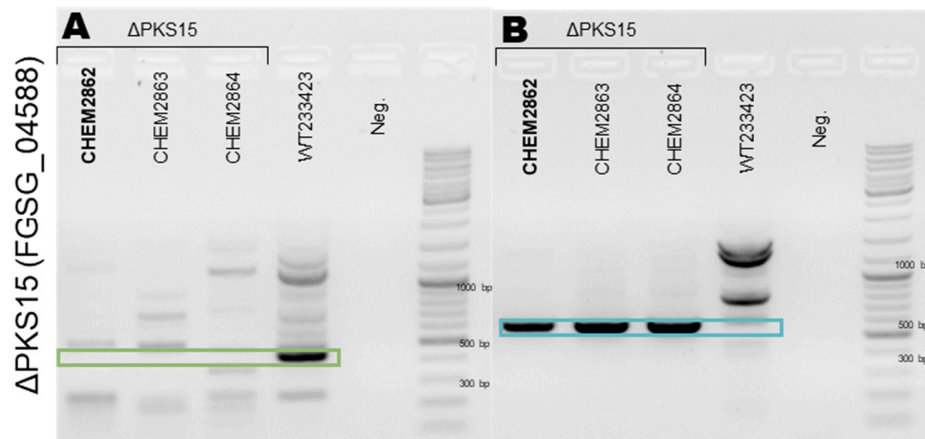

**Figure S2:** PCR validation of FGSG\_04588 KO strains by A) absence of amplification of the GOI as determined using primers internal to the GOI and B) presence of the hygromycin gene. Bolded strain indicates the strain used phenotype analysis and southern blot analysis.

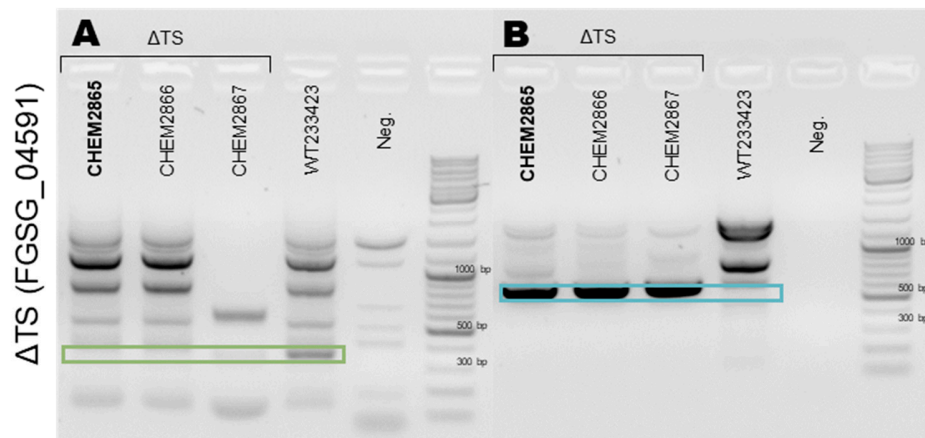

**Figure S3:** PCR validation of FGSG\_04591 KO strains by A) absence of amplification of the GOI as determined using primers internal to the GOI and B) presence of the hygromycin gene. Bolded strain indicates the strain used phenotype analysis and southern blot analysis.

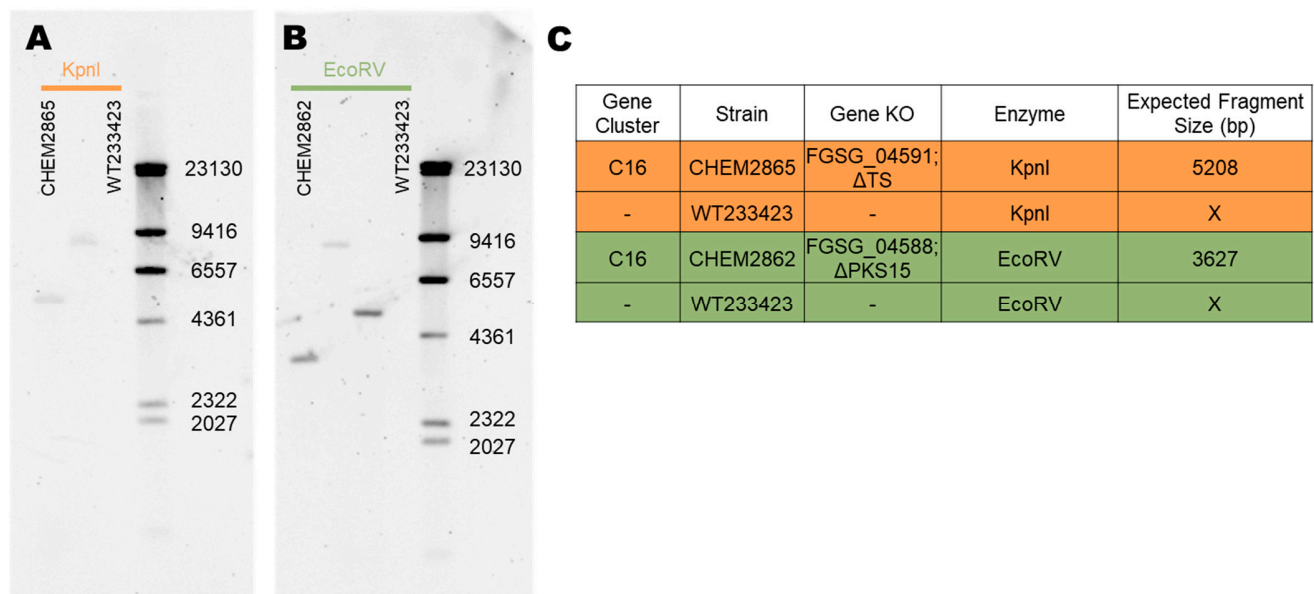

**Figure S4:** A) & B) Southern blot analysis of select transformants with hybridization probe specific of the *hygB* gene. Strains were organized by the enzyme used in the gDNA digest A BamHI and KpnI and B SacI and EcoRV. C) expected sized of the bands for each of the knockout strains.

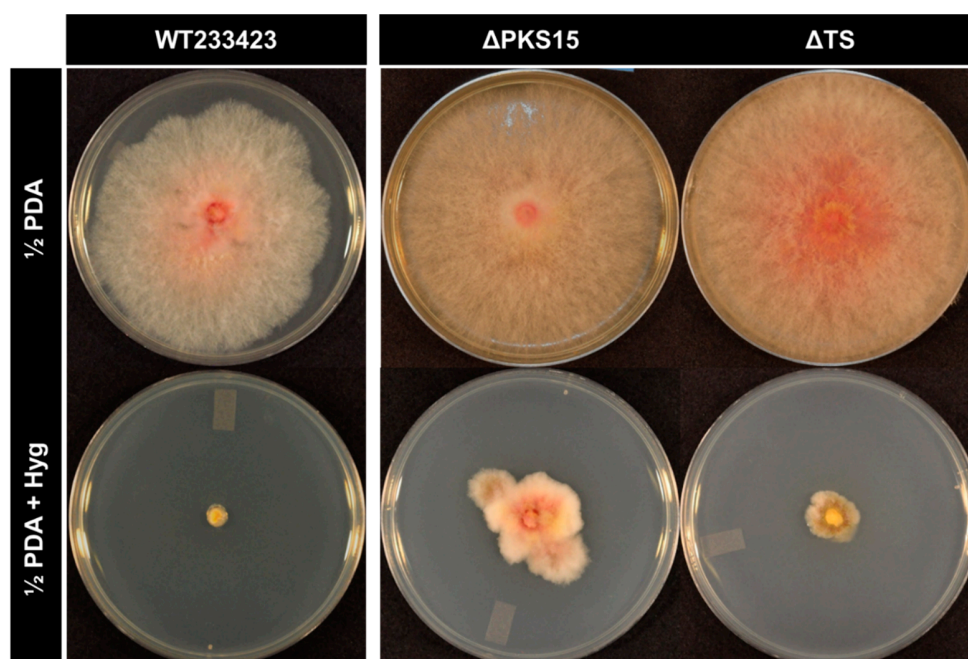

**Figure S5:** Phenotypes of respective *F. graminearum* WT and transformant strains cultured on 1/2 PDA (top) and 1/2 PDA supplemented with 100mg/L hygromycin (bottom).

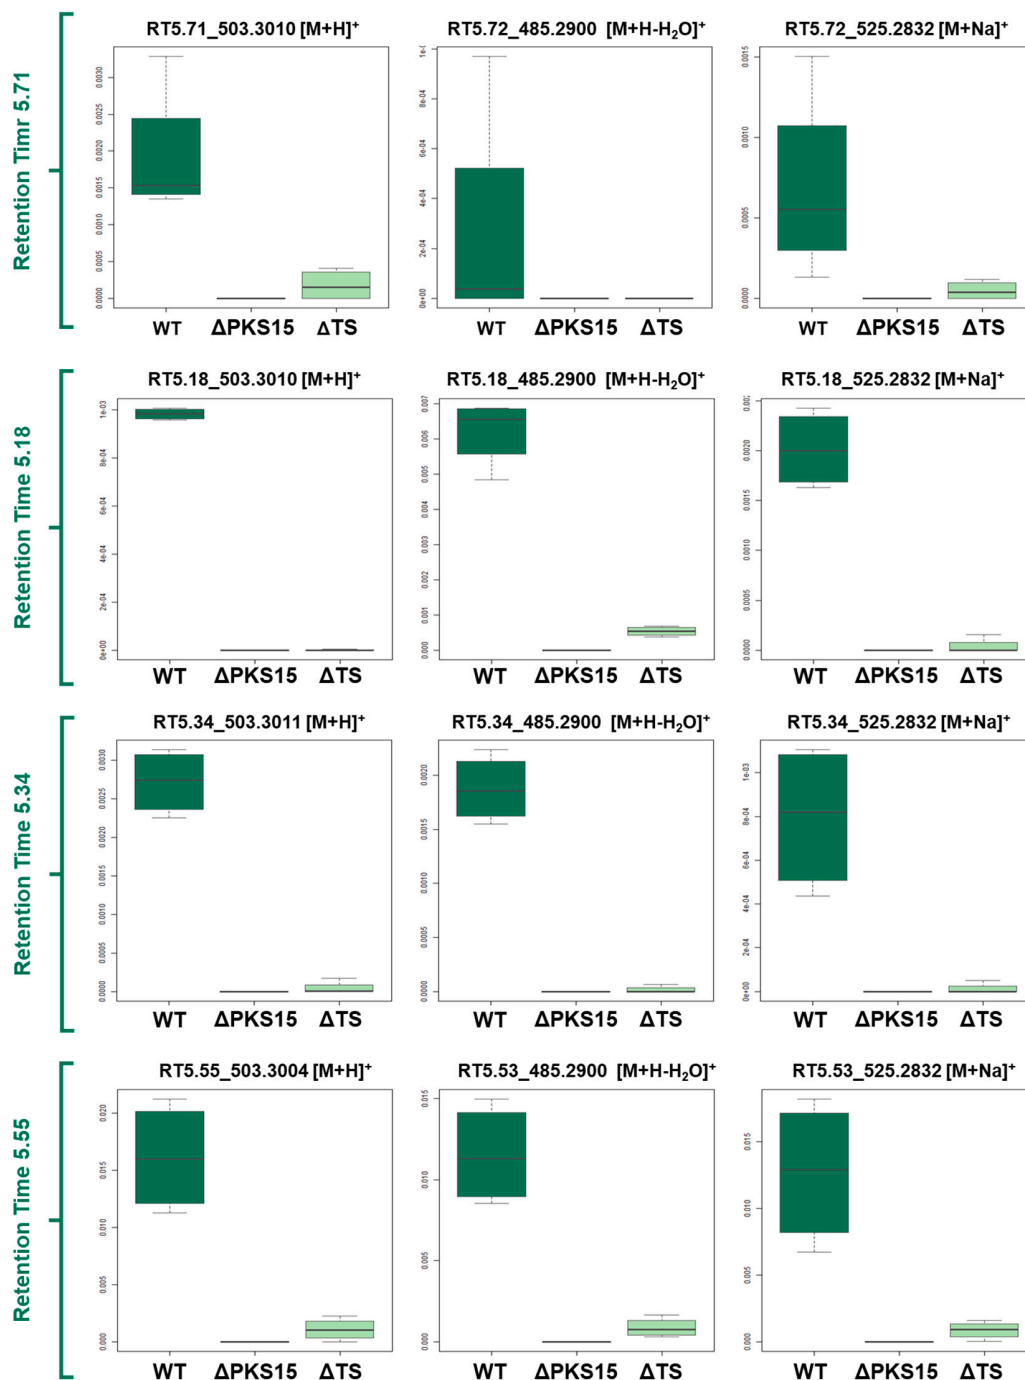

**Figure S6:** Observed *in planta* production of FDDP molecules by *F. graminearum* WT and transformant strains observed from UPLC-HRMS profiles of infected wheat head extracts.

**Table S7:** MS2 fragmentation comparison between values reported by Seidl et al, (2022) for gramiketide A and corresponding values observed from unknown mass feature RT5.51\_*m/z* 503.3004 in this study.

|            | Seidl et al, (2022) for<br>gramiketide A | Unknown mass feature<br>RT5.51_ <i>m/z</i> 503.3004 | Mass Error<br>(ppm) |
|------------|------------------------------------------|-----------------------------------------------------|---------------------|
| Precursor  | 503.3003                                 | 503.3003                                            |                     |
| Fragment 1 | 485.2891                                 | 485.2865                                            | Δ5.357              |
| Fragment 2 | 211.0596                                 | 211.059                                             | Δ2.843              |
| Fragment 3 | 197.044                                  | 197.0433                                            | Δ3.553              |
| Fragment 4 | 183.0284                                 | 183.0276                                            | Δ4.371              |
| Fragment 5 | 179.0335                                 | 179.0329                                            | Δ3.351              |
| Fragment 6 | 131.0337                                 | 131.0332                                            | Δ3.816              |
| Fragment 7 | 113.0233                                 | 113.0226                                            | Δ6.193              |

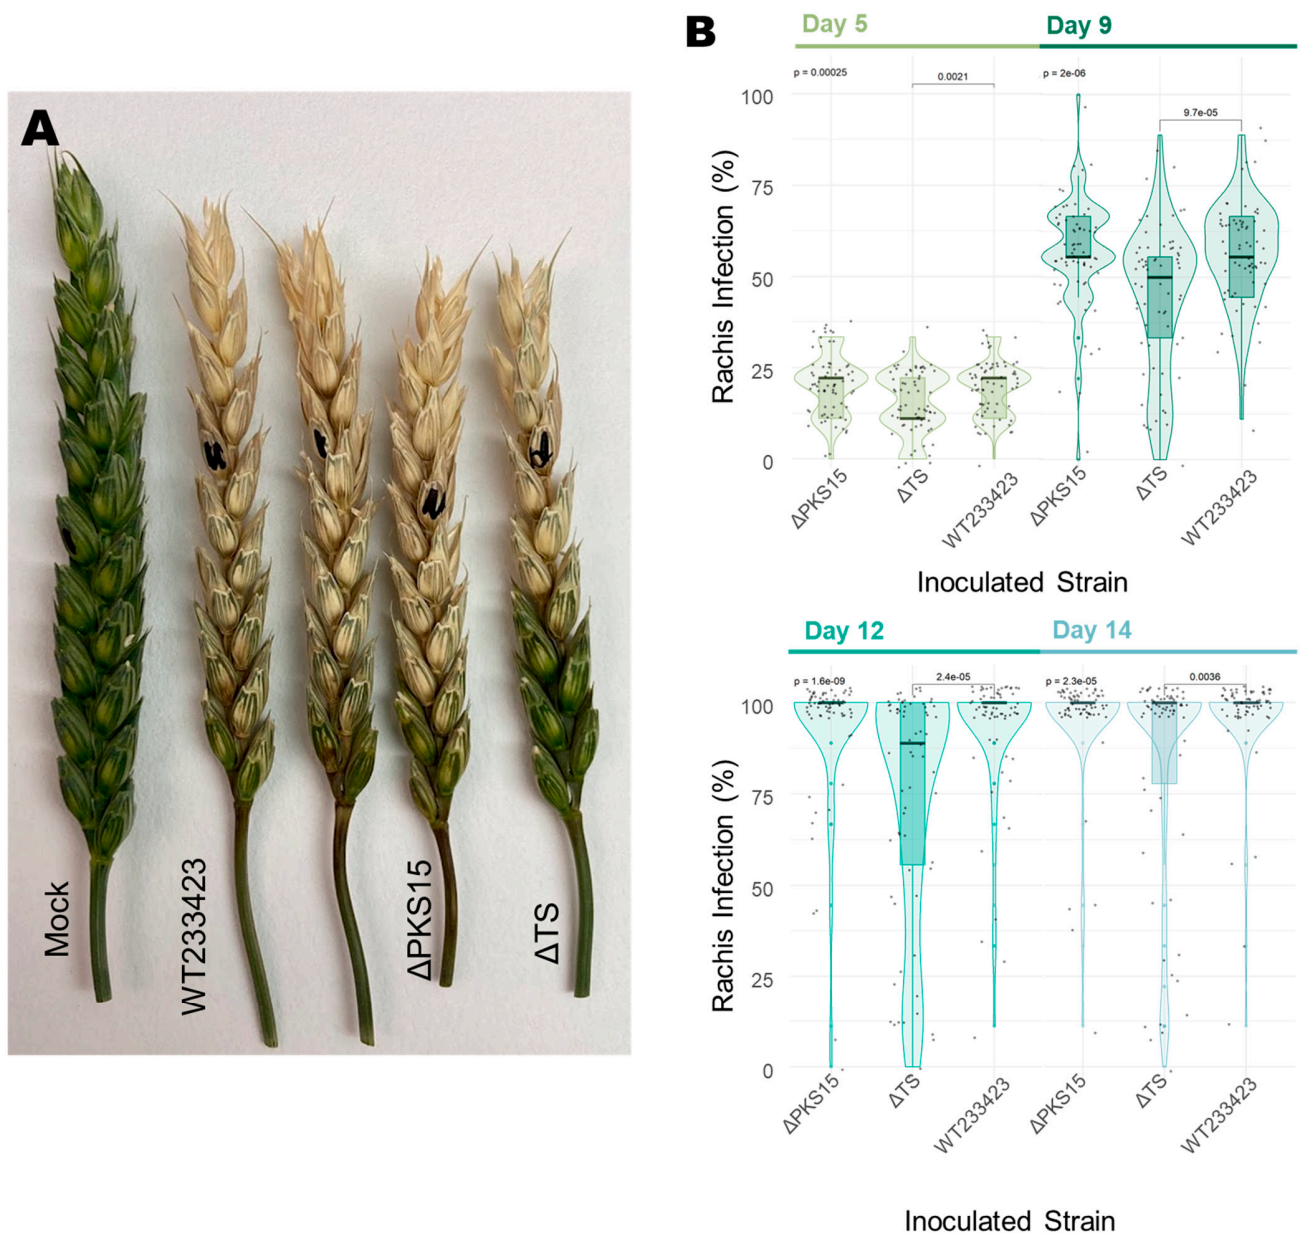

**Figure S7:** A) Observed phenotype differences 14 days post inoculation from wheat head challenge with *F. graminearum* WT and transformant strains ( $\Delta$ PKS15 and  $\Delta$ TS) as compared to mock infection control. Spikelets used for as point of inoculation are designated with black stripe. B) Violin plots tracking the % rachis infection rate 5, 9, 12 and 14 days post infection.
